# Supplementary material for: Clean room-free rapid fabrication of roll-up self-powered catalytic microengines
Source: Royal Society of Chemistry journal article supplement (doi:10.1039/c3ta14318j), 2013-12-11
Supplement: c3ta14318j.pdf [file c3ta14318j.pdf]

## Supporting Information

# Clean Room-Free Rapid Fabrication of High-Tech Roll-Up Self-Powered Catalytic Microengines

Guanjia Zhao, Adriano Ambrosi, Martin Pumera\*

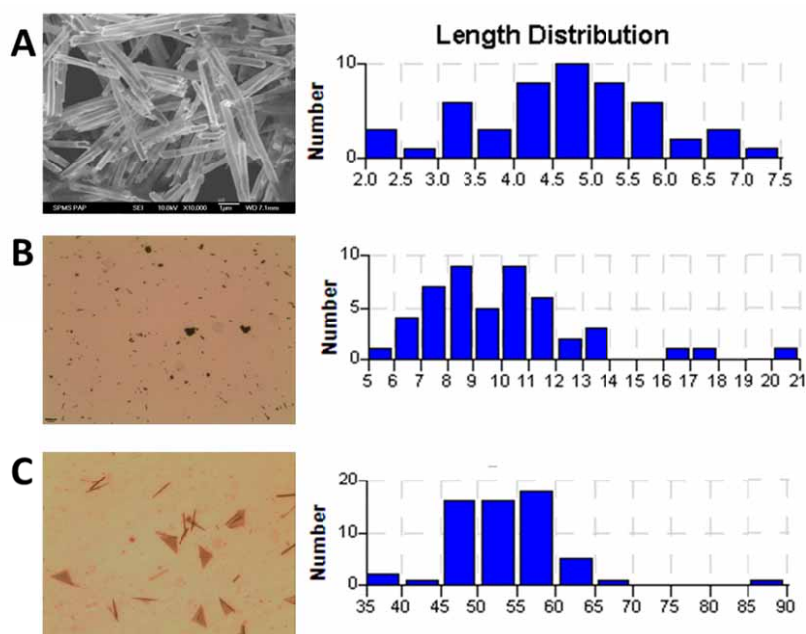

**Figure S1.** Characterizations and length distributions of different tubes. (A) SEM image and length distribution of the nanotubes fabricated through the AAO-templated electrochemical deposition processes. The average length was measured to be 4.63  $\mu\text{m}$  with a 25.1% RSD. (B) Microscope image and length distribution of the microtubes fabricated through the polycarbonate-templated electrochemical deposition processes. The average length was measured to be 9.98  $\mu\text{m}$  with a 28.5% RSD. (C) Microscope image and length distribution of the microtubes fabricated through the rolled-up processes on lithographically-patterned photoresist layers. The average length was measured to be 53.6  $\mu\text{m}$  with a 13.2% RSD. For all tubes, a minimum number of 45 tubes were counted.

**Table S1.** Size of microengines generated by the H<sub>2</sub>O<sub>2</sub> assisted lift-off of Pt membranes varying H<sub>2</sub>O<sub>2</sub> concentration.

| H <sub>2</sub> O <sub>2</sub><br>conc. (%) | Average<br>length (μm) | Min   | Max   | RSD % |
|--------------------------------------------|------------------------|-------|-------|-------|
| 7                                          | 21.05                  | 10.23 | 31.19 | 26.1  |
| 14                                         | 21.57                  | 9.03  | 37.23 | 31.8  |
| 21                                         | 12.35                  | 5.12  | 31.05 | 43.3  |
| 28                                         | 10.17                  | 3.53  | 4.1   | 34.7  |
